# Supplementary material
Source: PubMed Central journal article supplement (PMC6920602)
Supplement: NIHMS1530000-supplement-1.pdf [file NIHMS1530000-supplement-1.pdf]

Supplement 1: Focus group questions

## Focus Group Guide

### The role of companion animals in chronic pain management among community-dwelling adults aged 70+

This document is meant as a guide only. It is our intention that the participants at each focus group direct the flow of conversation. This document is not meant as a script, but as a tool for the moderator to make sure that all areas of discussion are covered. Questions formatted in *italics* are suggested probes that may or may not be necessary.

#### Questions for discussion

- *Tell us about your pets. (what type? what is your relationship like? How do you interact on a day-to-day basis.)*
- *Tell us about any ways that you think your pet affects your health. (note: broad definition of health – probe for both psychological and physical effects, and both positive and negative effects )*
- *Which aspects of your pet’s personality are helpful or not helpful when it comes to helping you cope with your pain?*
- *Imagine that you are having a pain flare-up. How does that change your interactions with your pet, and your ability to care for your pet? [probe: Are there any changes in your daily routine with your pet when you are having pain? Probe: ability to walk dog)*
- *How do your interactions with your pet affect your pain level? The extent to which you think about your pain?*
- *Now I will ask similar questions about feeling tired or fatigued. When you are tired or fatigued, how does that change your interactions with your pet? How do your interactions affect your fatigue level? The extent to which you think about your fatigue?*

- *What are some of the ways that your pet affects how you interact with other people? These can be positive or negative.*
- *How, if at all, does your pet help or make it more difficult for you to relax?*
- *How does your pet affect your physical activity?*
- *How does your pet affect your sleep, if at all?*
- *Do you have any worries or concerns regarding your pet?*
- *What kind of help do you need in taking care of your pet? Does this change if you are having a pain flare-up?*
- *Can you tell me a little bit about other things that you do to manage your pain?*
- *Is there anything else at all that you would like to tell us on the topic of pets and your health and everyday life?*

## Supplement 2: Focus group themes and associated codes

| <b>Themes</b>                                      | <b>Codes</b>                                                      |
|----------------------------------------------------|-------------------------------------------------------------------|
| <b>Mood Management</b>                             |                                                                   |
| Offers comfort, patience, support, protection      | #comforts<br>#support<br>#patient<br>#protects                    |
| Provides love, companionship, emotional connection | #indispensable<br>#companionship<br>#love<br>#memories<br>#family |
| Sense of responsibility, purpose, being needed     | #needed<br>#responsibility                                        |
| Makes life enjoyable, provides laughter            | #enjoyable<br>#laughter                                           |
| Prevents loneliness, fills a void                  | #loneliness                                                       |
|                                                    |                                                                   |
| <b>Relaxation/Distraction</b>                      |                                                                   |
| Physical presence, contact                         | #presence<br>#contact                                             |
| Intuitive response to owner's pain                 | #intuitive                                                        |
| Provides distraction from pain                     | #distraction                                                      |
| Aids with relaxation                               | #relax                                                            |
|                                                    |                                                                   |
| <b>Physical Activity</b>                           |                                                                   |
| Encourages walking                                 | #walking                                                          |
| Necessitates other physical activity               | #physical_activity                                                |
|                                                    |                                                                   |
| <b>Behavioral Activation</b>                       |                                                                   |
| Motivation, no choice but to get up, go outside    | #despite (pain)<br>#choice<br>#get_up<br>#outside                 |
| Provides a routine                                 | #routine<br>#pacing                                               |
| Encourages cognitive activation                    | #teach<br>#cognition                                              |
| Increases energy                                   | #energy                                                           |
|                                                    |                                                                   |
| <b>Social Activation</b>                           |                                                                   |
| Increases social activity with humans              | #social                                                           |
| Provides social connection with pets               | #communication<br>#talk<br>#listener                              |

|                                   |                                                                                                      |
|-----------------------------------|------------------------------------------------------------------------------------------------------|
|                                   |                                                                                                      |
| <b>Sleep</b>                      |                                                                                                      |
| Soothing presence                 | #sleep_comfort                                                                                       |
| Provides sense of security        | #sleep_protection                                                                                    |
| Encourages adherence to a routine | #sleep_routine                                                                                       |
|                                   |                                                                                                      |
| <b>Negative / Null Effects</b>    |                                                                                                      |
| Negative effects                  | #negative<br>#worse<br>#concerns<br>#cost<br>#difficulty<br>#unable<br>#PetHealth<br>#sleep_negative |
| Null effects                      | #no_effect                                                                                           |
